# Supplementary material
Source: Elsevier journal article supplement (https://rcastoragev2.blob.core.windows.net/0e60d06b20bb69b9533175734aa09980/mmc1.pdf)
Supplement: mmc1 [file mmc1.pdf]

## **Supplemental Information**

### **The Transcription Factor STAT6 Mediates Direct Repression of Inflammatory Enhancers and Limits Activation of Alternatively Polarized Macrophages**

**Zsolt Czimmerer, Bence Daniel, Attila Horvath, Dominik Rückerl, Gergely Nagy, Mate Kiss, Matthew Peloquin, Marietta M. Budai, Ixchelt Cuaranta-Monroy, Zoltan Simandi, Laszlo Steiner, Bela Nagy Jr., Szilard Poliska, Csaba Banko, Zsolt Bacso, Ira G. Schulman, Sascha Sauer, Jean-Francois Deleuze, Judith E. Allen, Szilvia Benko, and Laszlo Nagy**

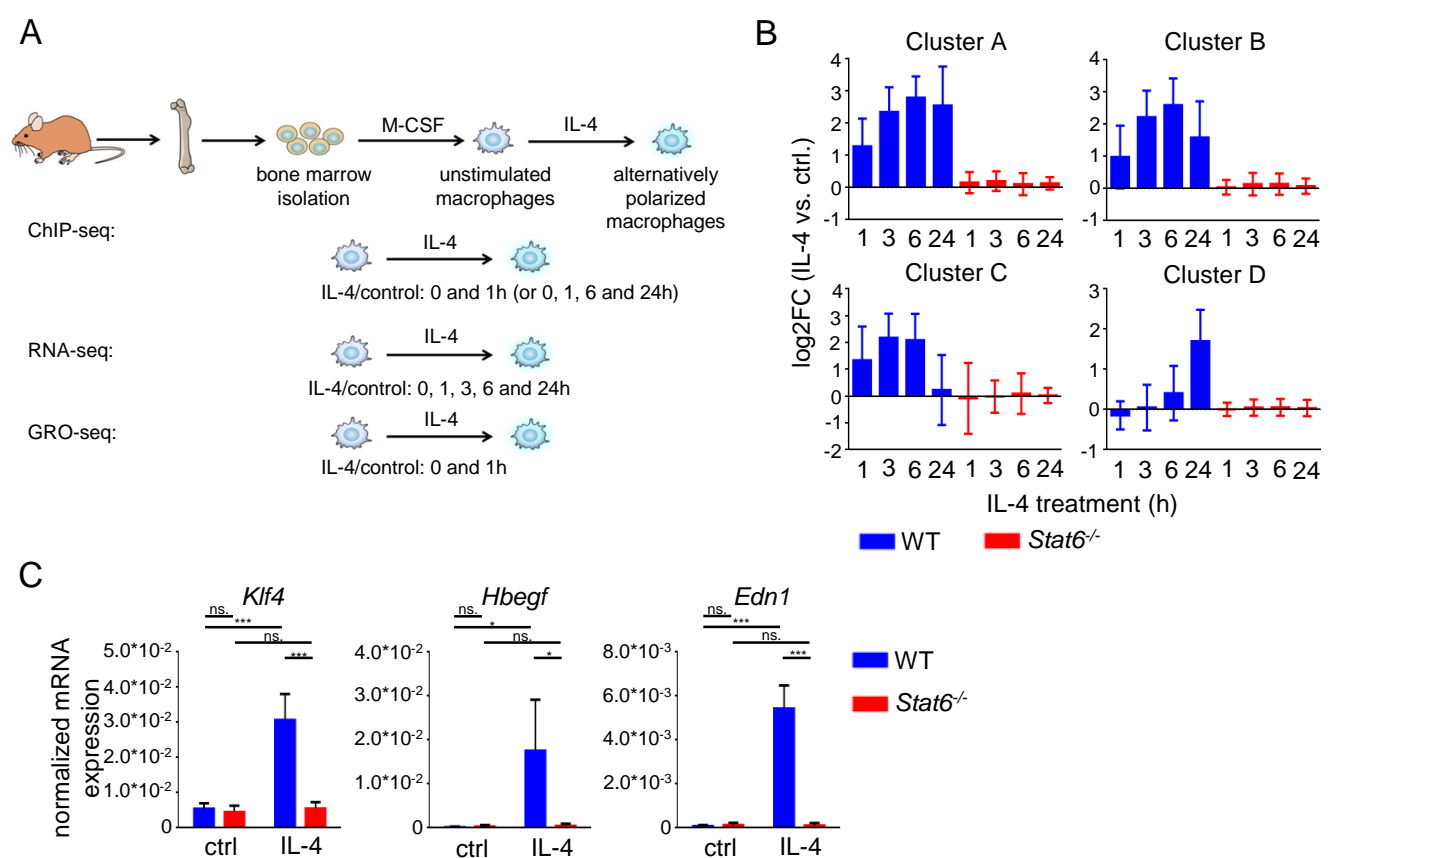

**Figure S1. (Related to Figure 1) Identification of IL-4-STAT6 signaling pathway-mediated global transcriptional changes in mouse BMDMs.** (A) Schematic representation of applied mouse alternative macrophage polarization protocol and experimental system. (B) The average fold change from the IL-4-repressed gene cluster at the indicated time points following IL-4 stimulation in WT (n=4) and *Stat6*<sup>-/-</sup> (n=2) BMDMs. Error bars represent means  $\pm$ SD. (C) RT-qPCR analysis of gene expression on a set of IL-4-activated genes in WT and *Stat6*<sup>-/-</sup> BMDMs. BMDMs were treated with IL-4 for 6 hours. Data are representative of five individual animals per genotype from two independent experiments. \* $P$ <0.05, \*\* $P$ <0.01, \*\*\* $P$ <0.001, ns. indicates not significant change. Error bars represent means  $\pm$ SD.

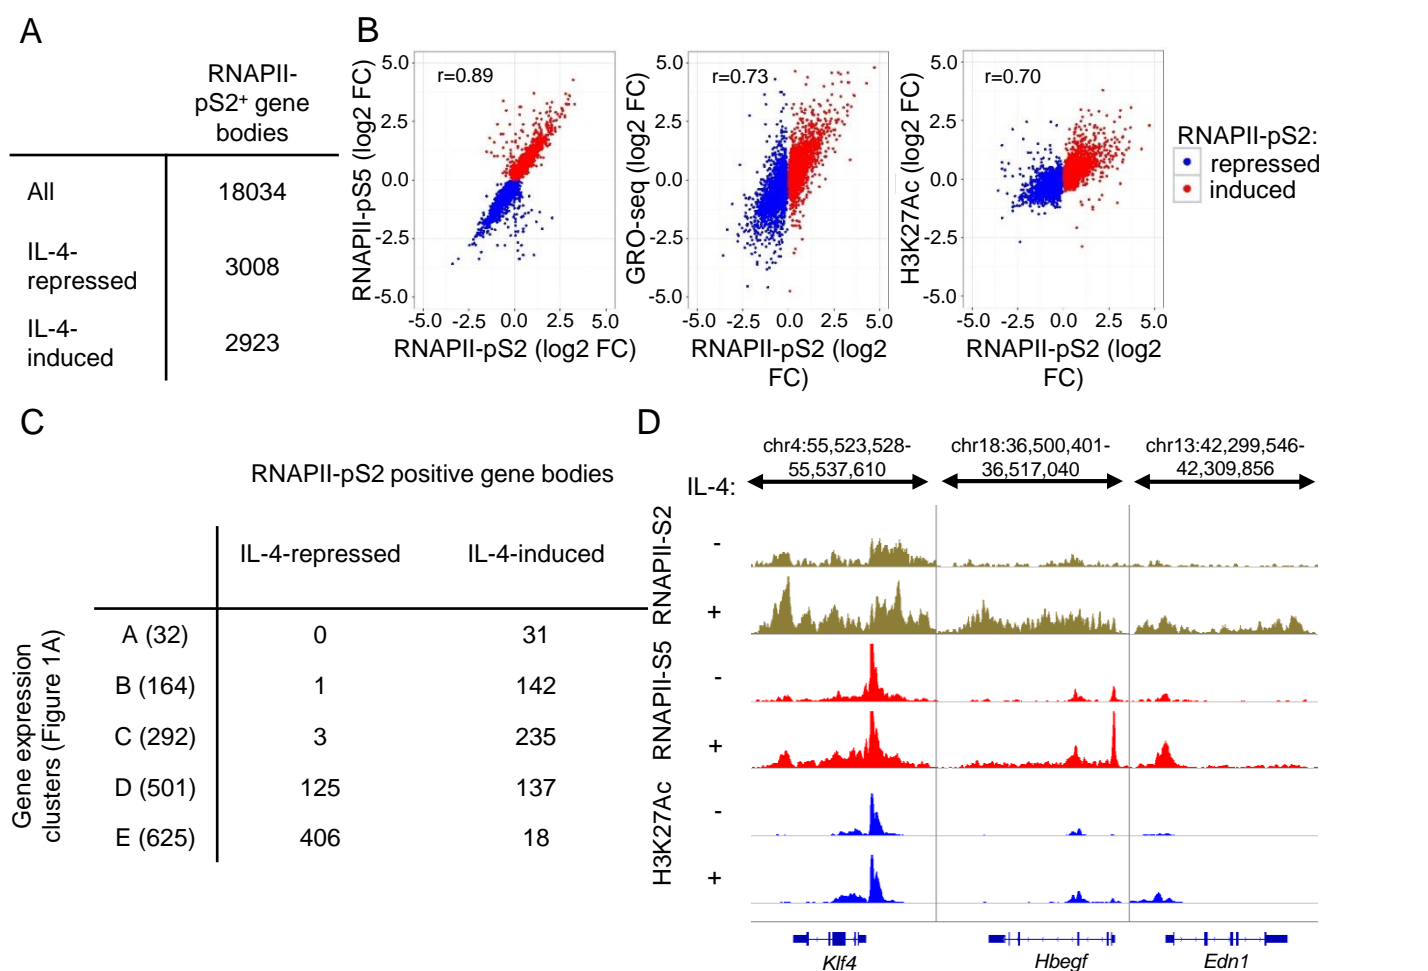

**Figure S2. (Related to Figure 2) Characterization of RNAPII binding, nascent RNA expression and H3K27Ac enrichment at the gene bodies of IL-4-responsive genes.** (A) The number of gene bodies associated with IL-4-dependent regulation of RNAPII-pS2 binding ( $p \leq 0.1$ ) in BMDMs. (B) Correlation of RNAPII-pS2 binding with RNAPII-pS5 binding, nascent RNA expression as well as H3K27Ac enrichment at the IL-4-regulated RNAPII-pS2 binding-associated gene bodies. Data (H3K27Ac, RNAPII-pS2 and RNAPII-pS5) are combined from two independent biological replicates. (C) Overlap between IL-4-regulated gene expression clusters (Figure 1A) and IL-4-regulated RNAPII-pS2-associated gene bodies (Figure S2A). (D) H3K27Ac, RNAPII-pS5 and RNAPII-pS2 ChIP-Seq signals at the selected IL-4-activated gene bodies. ChIP-seq signals are visualized by the Integrative Genomics Viewer. Data are representative of two independent biological replicates.

BMDMs were treated with IL-4 for 1 hour in (A, B and D).

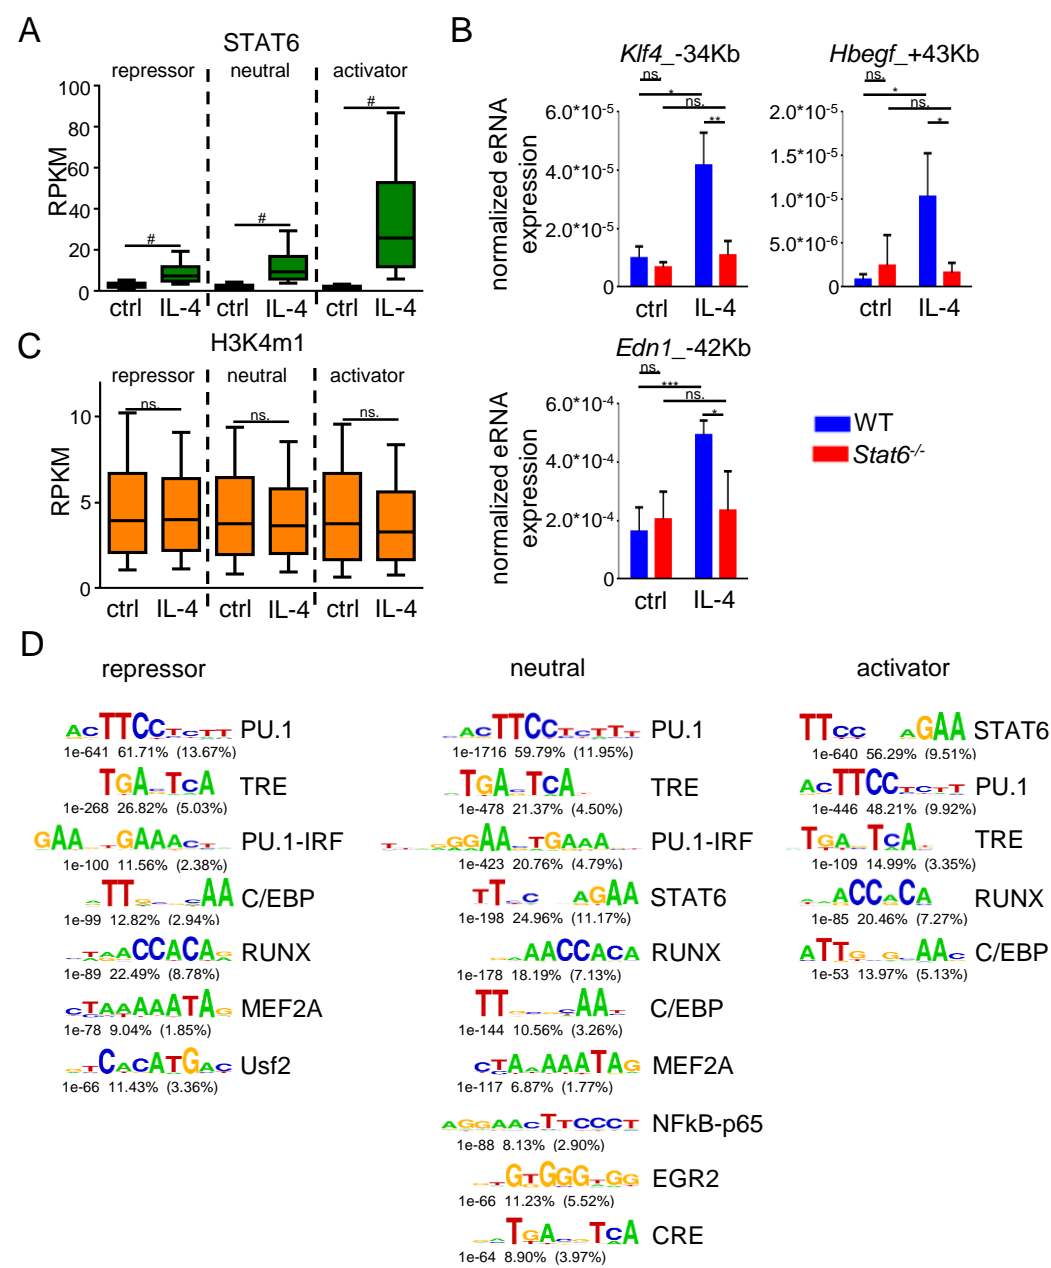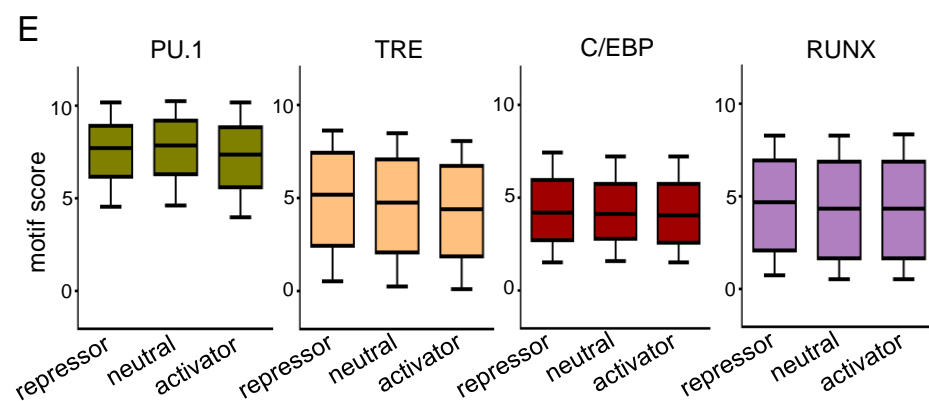

**Figure S3. (Related to Figure 3) Characterization of RNAPII-pS5 positive STAT6 peak clusters.** (A) Box plot representation of STAT6 transcription factor binding at the STAT6-occupied RNAPII-pS5<sup>+</sup> genomic regions in WT macrophages. BMDMs were treated with IL-4 for 1 hour. Boxes encompass the 25th to 75th percentile RPKMs. Whiskers extend to the 10th and 90th percentiles. Changes were considered significant at  $p < 0.00001$  using paired t-test and the average of fold differences at the individual enhancers  $\geq 1.15$ . #  $p < 0.00001$  and average fold difference  $\geq 1.15$ , ns. indicates not significant. (B) RT-qPCR measurements of eRNA expression at IL-4-repressed enhancers in WT and *Stat6*<sup>-/-</sup> macrophages. BMDMs were treated with IL-4 for 1 hour. Data are representative of five individual animals per genotype from two independent experiments. \* $P < 0.05$ , \*\* $P < 0.01$ , \*\*\* $P < 0.001$ , ns. indicates not significant change. Error bars represent means  $\pm$ SD. (C) Box plot representation of H3K4m1 enrichment at the surrounding genomic regions of the identified STAT6 peak clusters in WT macrophages. Macrophages were treated with IL-4 for 4 hours. Boxes encompass the 25th to 75th percentile RPKMs. Whiskers extend to the 10th and 90th percentiles. Changes were considered significant at  $p < 0.00001$  using paired t-test and the average of fold differences at the individual enhancers  $\geq 1.15$ . #  $p < 0.00001$  and average fold difference  $\geq 1.15$ , ns. indicates not significant. (D) De novo motif enrichment identification under different STAT6 peak clusters from ChIP-seq data using HOMER. “Target %” refers to the ratio of the peaks having the given motif, and “Bg %” refers to the ratio of a random background. (E) Box plot representation of PU.1, TRE, C/EBP and RUNX motif scores on genomic regions under different STAT6 peak clusters. Boxes encompass the 25th to 75th percentile motif scores. Whiskers extend to the 10th and 90th percentiles.

**A**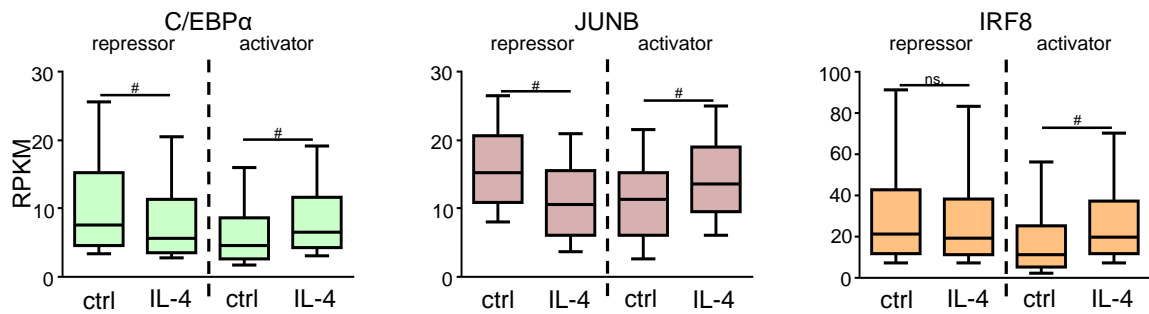**B**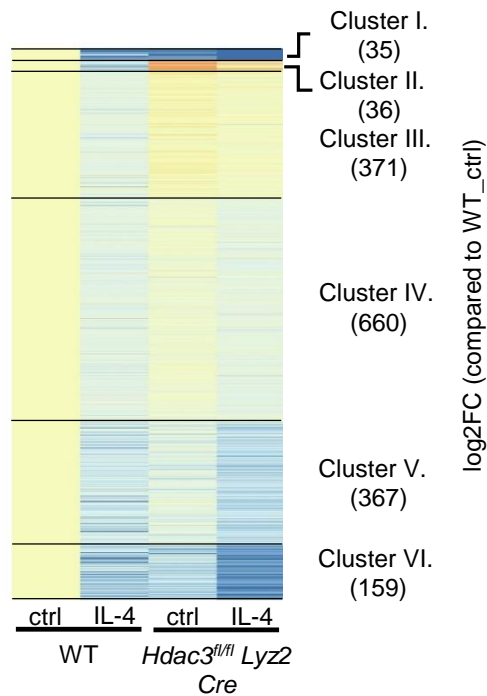**C**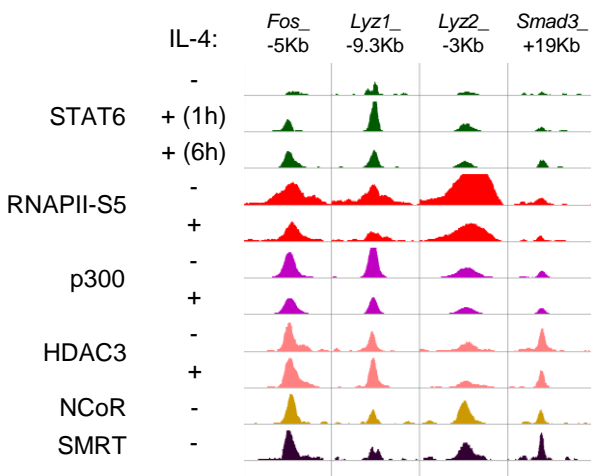**D**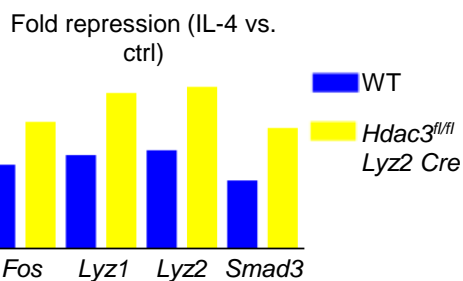**E**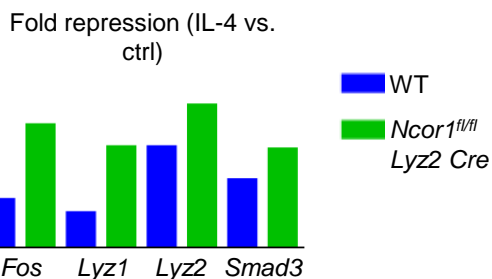**F**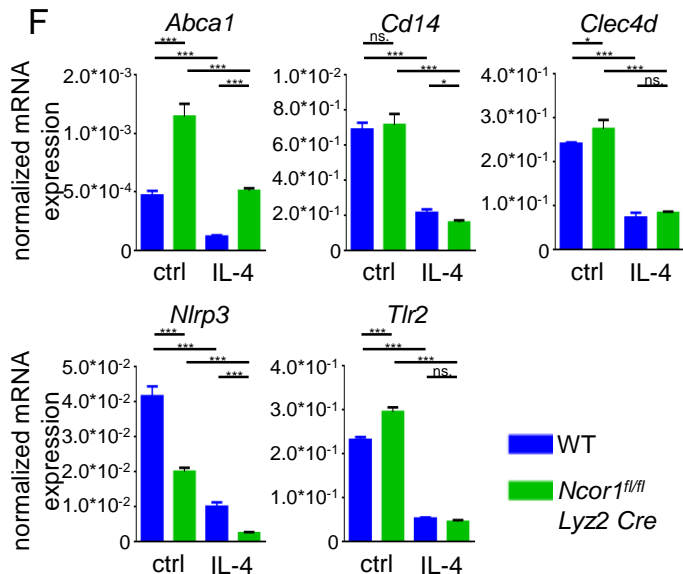

**Figure S4. (Related to Figure 4) Characterization of IL-4-STAT6 signaling pathway-mediated transcriptional re-repression and activation at the STAT6 bound enhancers.** (A) Box plot representation of JunB, C/EBP $\alpha$  and IRF8 ChIP-seq signals at the STAT6-occupied genomic regions in WT macrophages. BMDMs were treated with IL-4 for 1 hour. Boxes encompass the 25th to 75th percentile RPKMs. Whiskers extend to the 10th and 90th percentiles. Changes were considered significant at  $p < 0.00001$  using paired t-test and the average of fold differences at the individual enhancers  $\geq 1.15$ . #  $p < 0.00001$  and average fold difference  $\geq 1.15$ , ns. indicates not significant. (B) Heat map representation of IL-4-repressed gene clusters ( $p \leq 0.05$ ) in unstimulated and IL-4 stimulated WT and *Hdac3<sup>fl/fl</sup> Lyz2 Cre* murine macrophages. Clustering was based on the participation of HDAC3 in the IL-4-mediated repression. BMDMs were treated with IL-4 for 24 hours. (C) Representative examples of IL-4-STAT6-HDAC3-repressed genes-associated enhancers. Genome browser view of the merge of STAT6, RNAPII-pS5, p300 and HDAC3-specific ChIP-seq from unstimulated or IL-4-stimulated WT as well as SMRT and NCoR ChIP-seq from unstimulated WT macrophages. (D) Fold repression of *Fos*, *Lyz1*, *Lyz2* and *Smad3* expression between IL-4-stimulated and unstimulated WT as well as *Hdac3<sup>fl/fl</sup> Lyz2 Cre* BMDMs. BMDMs were treated with IL-4 for 24 hours. (E) Fold repression of *Fos*, *Lyz1*, *Lyz2* and *Smad3* expression between IL-4-stimulated and unstimulated WT as well as *Ncor1<sup>fl/fl</sup> Lyz2 Cre* iBMDMs. BMDMs were treated with IL-4 for 24 hours. (F) RT-qPCR-based measurement of *Abca1*, *Cd14*, *Clec4d*, *Nlrp3* and *Tlr2* expression in unstimulated as well as IL-4 stimulated WT and *Ncor1<sup>fl/fl</sup> Lyz2 Cre* iBMDMs. BMDMs were treated with IL-4 for 24 hours. Data represent the mean and SD of three independent biological replicates. \* $P < 0.05$ , \*\* $P < 0.01$ , \*\*\* $P < 0.001$ , ns. indicates no significant difference.

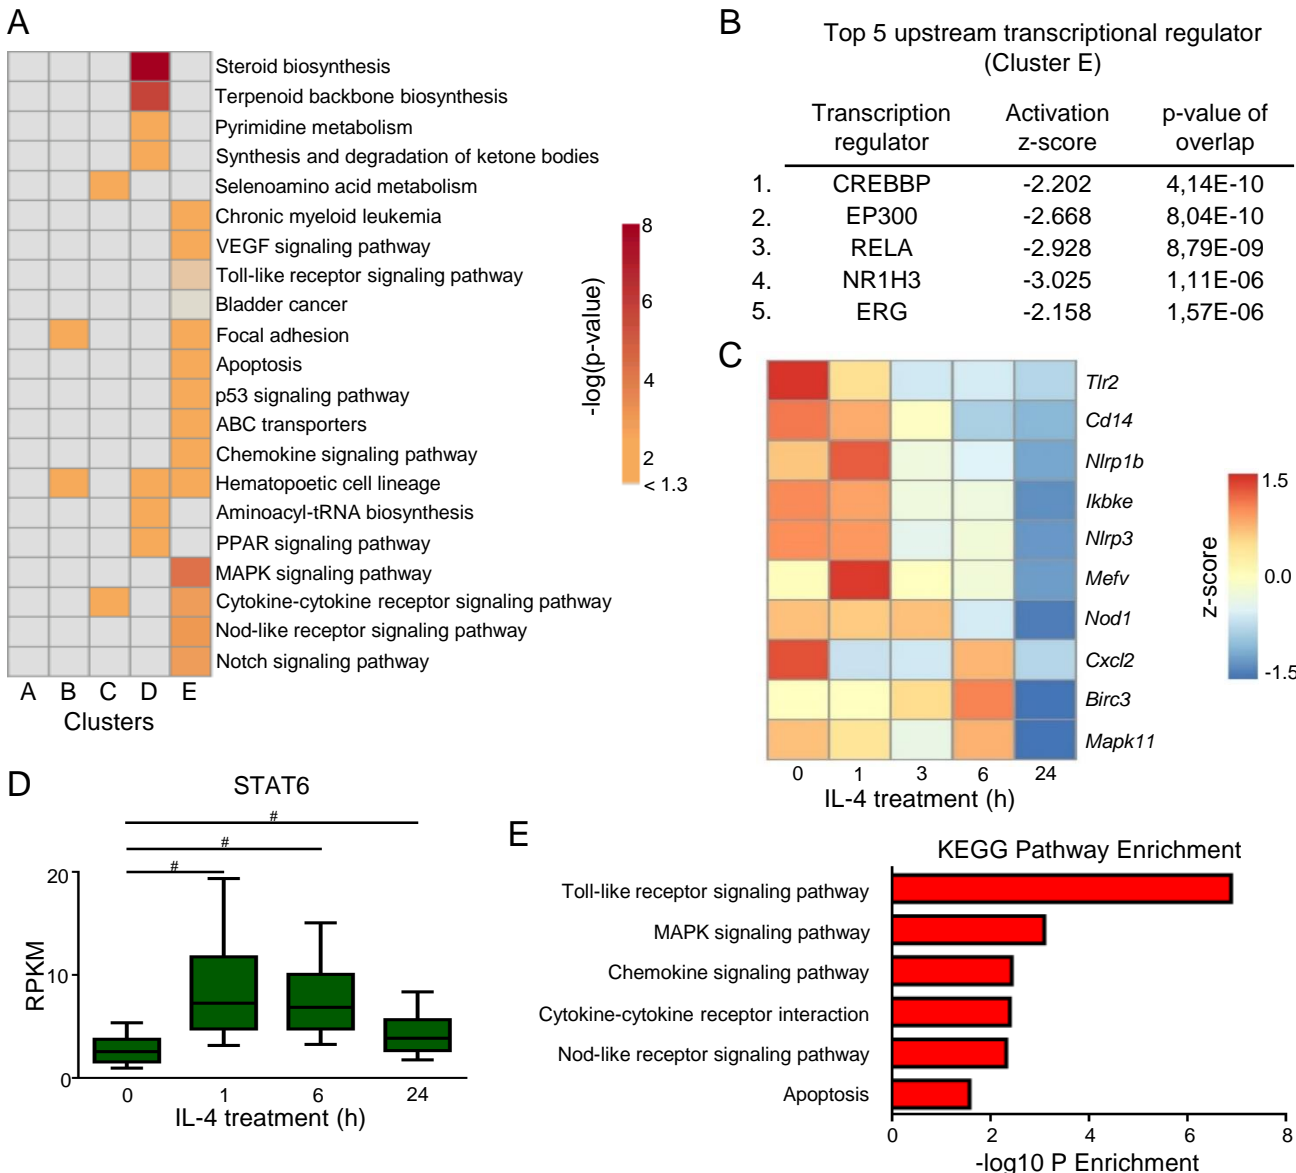

**Figure S5. (Related to Figure 5)** (A) Five IL-4-regulated gene clusters-associated significantly enriched KEGG pathway categories. (B) Ingenuity Pathway Analysis algorithm-based prediction of top upstream transcriptional regulators of IL-4-repressed genes. Transcription regulators showing  $p$ -value overlap  $<0.01$  and regulation  $z$ -score  $>2$  or  $<-2$  are shown. (C) Heat map representation of IL-4-regulated gene expression of the selected members of Toll-like and Nod-like receptor pathways in murine BMDMs. BMDMs were treated with IL-4 for 1, 3, 6 and 24 hours. (D) Box plot representation of STAT6 transcription factor binding at the "repressor" STAT6-occupied RNAPII-pS5<sup>+</sup> genomic regions in WT BMDMs. BMDMs were treated with IL-4 for 1, 6 and 24 hours. Boxes encompass the 25th to 75th percentile RPKMs. Whiskers extend to the 10th and 90th percentiles. Changes were considered significant at  $p<0.00001$  using paired t-test and the average of fold differences at the individual enhancers  $\geq 1.15$ . #  $p<0.00001$  and average fold difference  $\geq 1.15$ , ns. indicates not significant. (E) IL-4-attenuated LPS-inducible gene cluster-associated significantly enriched KEGG pathway categories.



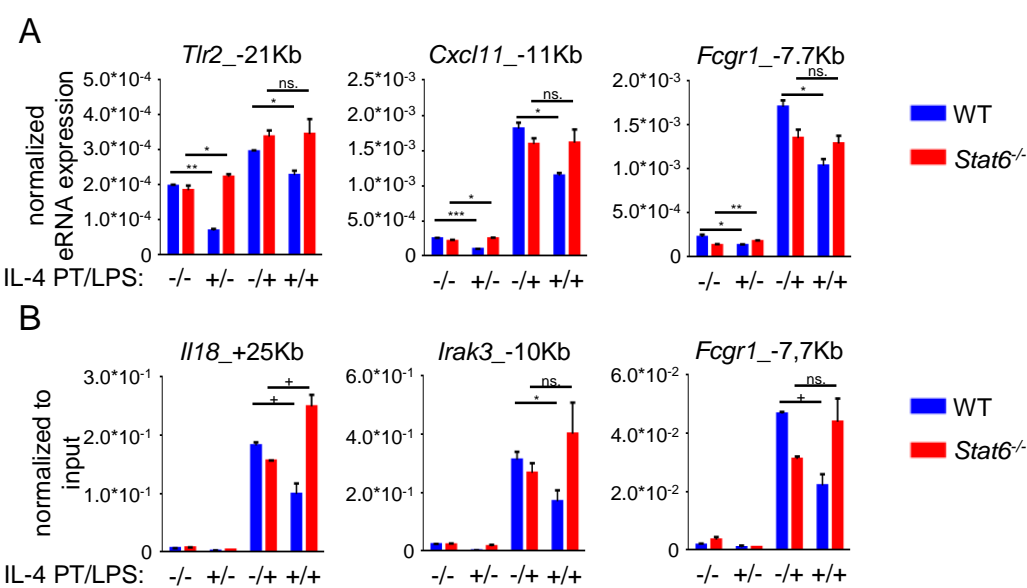

**Figure S6. (Related to Figure 6) Investigation of IL-4 pretreatment-mediated repression at the selected LPS-activated enhancers.** (A) RT-qPCR-based measurement of basal and LPS-induced eRNA expression at the selected enhancers in IL-4-pre-treated and unstimulated WT and *Stat6*<sup>-/-</sup> iBMDMs. iBMDMs were pretreated with IL-4 for 24 hours followed by 3 hours LPS exposure. Data represent the mean and SD of three biological replicates. \**P*<0.05, \*\**P*<0.01, \*\*\**P*<0.001, ns. indicates not significant. (B) ChIP-qPCR-based measurement of p65 binding at the selected IL-4-repressed LPS-responsive enhancers from WT and *Stat6*<sup>-/-</sup> BMDMs. BMDMs were pretreated with IL-4 for 24 hours followed by 1 hour LPS exposure. Data represent the mean and SD of two biological replicates. \**P*<0.1, \**P*<0.5, ns. indicates not significant.

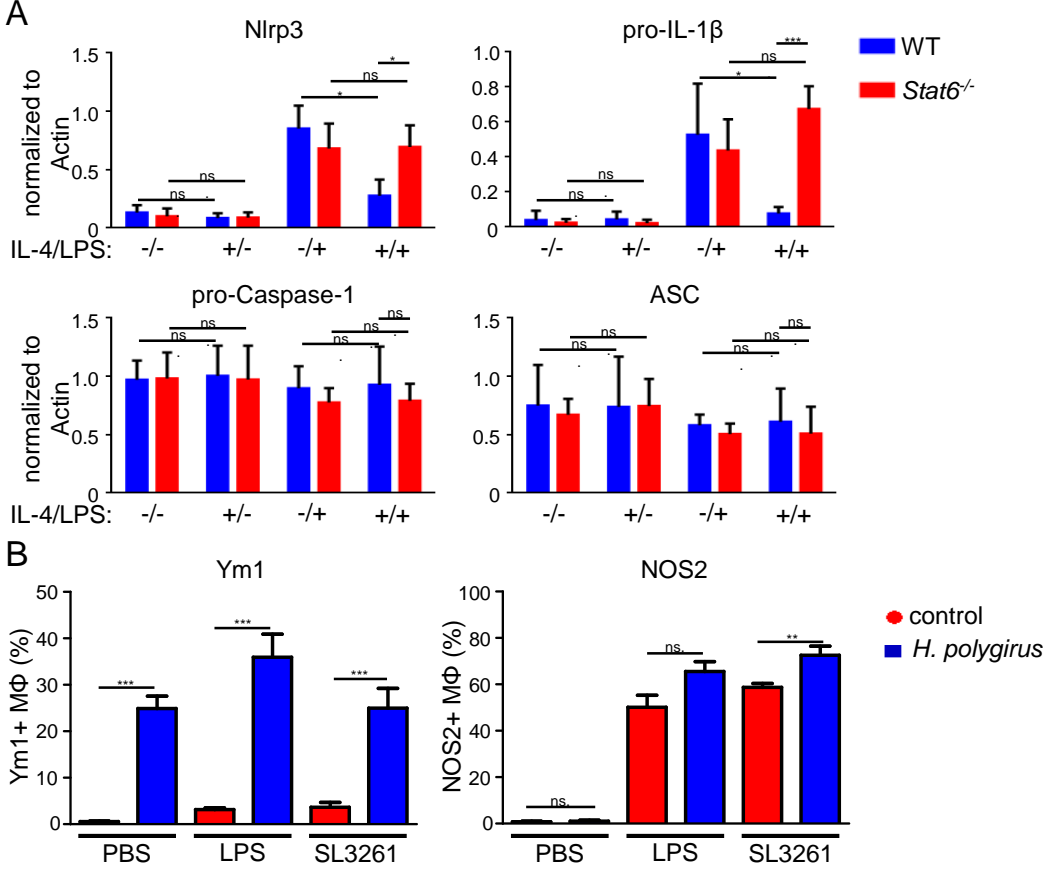

**Figure S7. (Related to Figure 7)** (A) Western blot densitometry analysis of basal and LPS-regulated Nlrp3, pro-IL-1 $\beta$ , pro-Caspase1, ASC and  $\beta$ -actin expression at protein levels in IL-4-pre-treated and unstimulated WT and *Stat6*<sup>-/-</sup> mouse BMDMs. BMDMs were pretreated with IL-4 for 24 hours followed by 3 hours LPS exposure. Data represent the mean and SD of five individual animals from two independent experiments. \* $P$ <0.05, \*\* $P$ <0.01, \*\*\* $P$ <0.001, ns. indicates not significant. (B) The percentage of Ym1 positive and NOS2 positive peritoneal macrophage number in control and *Heligmosomoides polygyrus* (*H. polygyrus*)-infected mice following PBS and LPS injection as well as *Salmonella Typhimurium* (SL3261)-infection. Data represent the mean and SD of four-eleven individual animals. \* $P$ <0.05, \*\* $P$ <0.01, \*\*\* $P$ <0.001, ns. indicates not significant.
